# Supplementary material
Source: publisher figshare collection journal article supplement (https://acs.figshare.com/ndownloader/files/3916765)
Supplement: Supplementary file 1 [file 3916765]

# Hydrogen-Bonded Polymers with Bent-Shaped Side Chains and Poly(4-vinylpyridine) Backbone: Phase Behavior and Thin Film Morphologies.

*Xiaoshan Liu,<sup>†,‡</sup> Xiaofang Chen,<sup>\*,†</sup> Jingkui Wang,<sup>†</sup> Gang Chen,<sup>\*,§</sup> and Hailiang Zhang<sup>\*,‡</sup>*

<sup>†</sup> College of Chemistry, Chemical Engineering and Material Science, Soochow University,  
Suzhou 215123, P. R. China

<sup>‡</sup> College of Chemistry, Xiangtan University, Xiangtan 411105, P. R. China

<sup>§</sup> Shanghai Institute of Applied Physics, Chinese Academy of Science, Shanghai 201800, P. R.  
China

## Experimental Section

**Materials.** 3,4,5-trihydroxybenzoic acid methyl ester (98%), 1-bromodecane (98%), K<sub>2</sub>CO<sub>3</sub>, KOH, ethanol (99.5%), ethyl acetate (99.8%), acetone (99.9%), dichloromethane (99.5%), 4-(dimethylamino)pyridine (DMAP, 99%), *N,N*-dicyclohexylcarbodiimide (DCC, 95%), 4-benzyloxyphenyl (99%) and palladium carbon catalyst were used as received from Beijing Chemical Co. 1,4-Dioxane (99%) was also purchased from Beijing Chemical Co. and was refluxed over sodium under argon and distilled before use. Poly(4-vinylpyridine) (P4VP, weight-average molecular weight, *M<sub>w</sub>* 5600) was purchased from Polymer Source Inc. Silicon wafers

[p-doped, (100)-oriented, 0.45 mm thick, and 100 mm in diameter] were from Guangzhou Semiconductor Materials (Guangzhou, China).

Nuclear Magnetic Resonance Spectroscopy ( $^1\text{H}$ NMR) measurements were performed on a Bruker ARX400 MHz spectrometer using with  $\text{CDCl}_3$  as solvent, tetramethylsilane (TMS) as the internal standard at room temperature.

10CBP:  $^1\text{H}$  NMR( $\delta$ , ppm,  $\text{CDCl}_3$ ): 0.86-0.90 (t, 9H,  $-\text{CH}_3$ ), 1.26-1.51 (m, 42H,  $-(\text{CH}_2)_7-$ ), 1.79-1.86 (m, 6H,  $3\text{-OCH}_2\text{CH}_2-$ ), 4.04-4.09 (t, 6H,  $3\text{-O-CH}_2-$ ), 4.8 (s, 1H,  $-\text{OH}$ ), 6.88-6.91 (d, 2H, Ar-*H*), 7.11-7.14 (d, 2H, Ar-*H*), 7.27-7.31 (m, 2H, Ar-*H*), 7.42 (s, 4H, Ar-*H*), 7.70 (m, 1H, Ar-*H*), 8.46-8.49 (d, 2H, Ar-*H*), 9.02 (s, 1H, Ar-*H*). Elemental Analysis: Anal. Calcd for  $\text{C}_{57}\text{H}_{78}\text{O}_{10}$ : C, 74.15; H, 8.52. Found: C, 74.17; H, 8.60.

12CBP:  $^1\text{H}$  NMR( $\delta$ , ppm,  $\text{CDCl}_3$ ): 0.86-0.90 (t, 9H,  $-\text{CH}_3$ ), 1.26-1.54 (m, 54H,  $-(\text{CH}_2)_9-$ ), 1.73-1.87 (m, 6H,  $3\text{-OCH}_2\text{CH}_2-$ ), 4.04-4.09 (t, 6H,  $3\text{-O-CH}_2-$ ), 5.14 (s, 1H,  $-\text{OH}$ ), 6.87-6.90 (d, 2H, Ar-*H*), 7.09-7.12 (d, 2H, Ar-*H*), 7.27-7.32 (m, 2H, Ar-*H*), 7.41 (s, 4H, Ar-*H*), 7.68-7.71 (m, 1H, Ar-*H*), 8.45-8.47 (d, 2H, Ar-*H*), 9.01 (s, 1H, Ar-*H*). Elemental Analysis: Anal. Calcd for  $\text{C}_{63}\text{H}_{90}\text{O}_{10}$ : C, 75.11; H, 9.00. Found: C, 75.22; H, 9.16.

14CBP:  $^1\text{H}$  NMR( $\delta$ , ppm,  $\text{CDCl}_3$ ): 0.86-0.90 (t, 9H,  $-\text{CH}_3$ ), 1.26-1.54 (m, 66H,  $-(\text{CH}_2)_7-$ ), 1.75-1.86 (m, 6H,  $3\text{-OCH}_2\text{CH}_2-$ ), 4.04-4.08 (t, 6H,  $3\text{-O-CH}_2-$ ), 6.88-6.90 (d, 2H, Ar-*H*), 7.11-7.13 (d, 2H, Ar-*H*), 7.26-7.33 (m, 2H, Ar-*H*), 7.41 (s, 4H, Ar-*H*), 7.68-7.71 (m, 1H, Ar-*H*), 8.45-8.47 (d, 2H, Ar-*H*), 9.01 (s, 1H, Ar-*H*). Elemental Analysis: Anal. Calcd for  $\text{C}_{69}\text{H}_{102}\text{O}_{10}$ : C, 75.42; H, 9.42. Found: C, 75.63; H, 9.46.

## Electron Density Reconstruction

The reconstruction of relative electron density distribution in real space based on XRD data is calculated according to the literature<sup>1</sup>. Considering the hexagonal columnar phase, three clear peaks can be assigned for PVP(10CBP)<sub>0.75</sub>. These peaks are related to reflection (10), (11), (20). The electron density profiles have been calculated using the suitable phase combinations of “+ – –” for the corresponding reflections.

### Supporting Figures

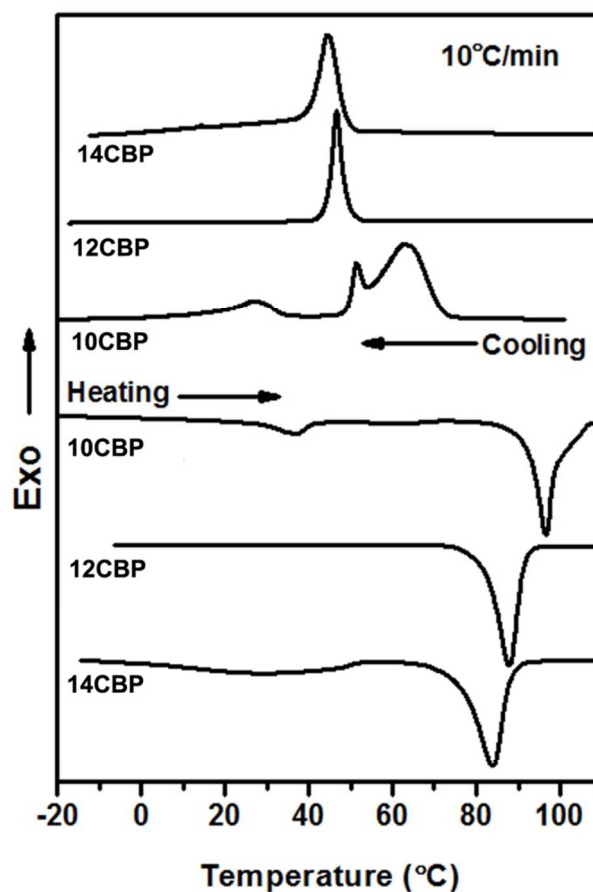

**Figure S1.** DSC curves of nCBP during first cooling and second heating at a rate of 10 °C/min under N<sub>2</sub> atmosphere

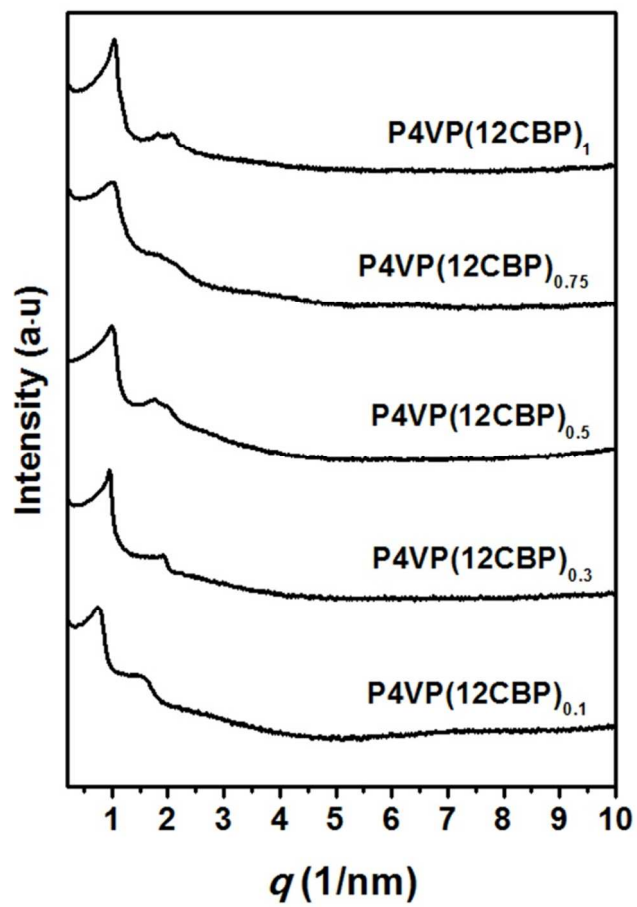

**Figure S2.** SAXS profiles of P4VP(12CBP)<sub>x</sub> complexes recorded at 25 °C

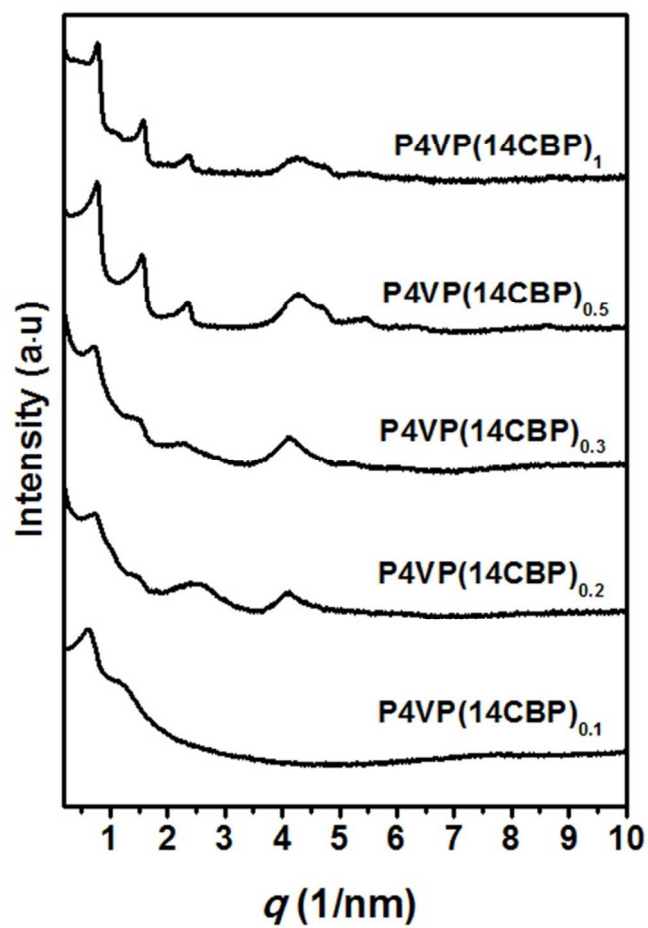

**Figure S3.** SAXS profiles of P4VP(14CBP)<sub>x</sub> complexes recorded at 25 °C.

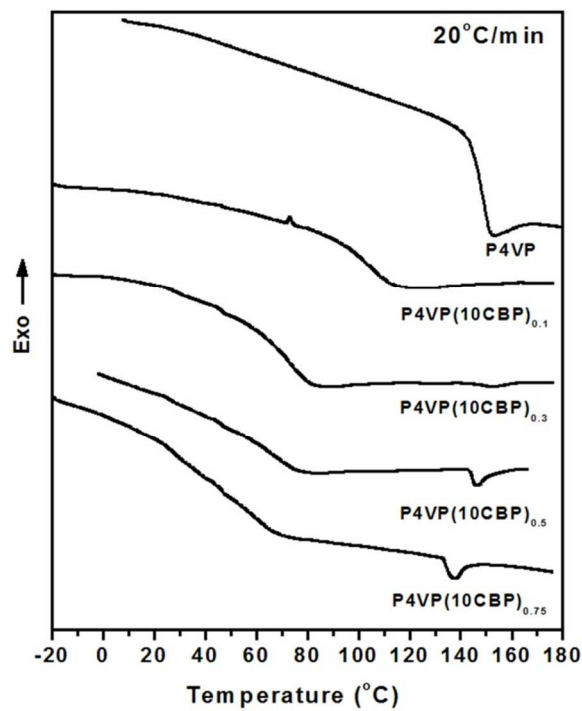

**Figure S4.** DSC curves of P4VP and P4VP(10CBP)<sub>x</sub> during the second heating cycle at a rate of 20 °C/min under N<sub>2</sub> atmosphere.

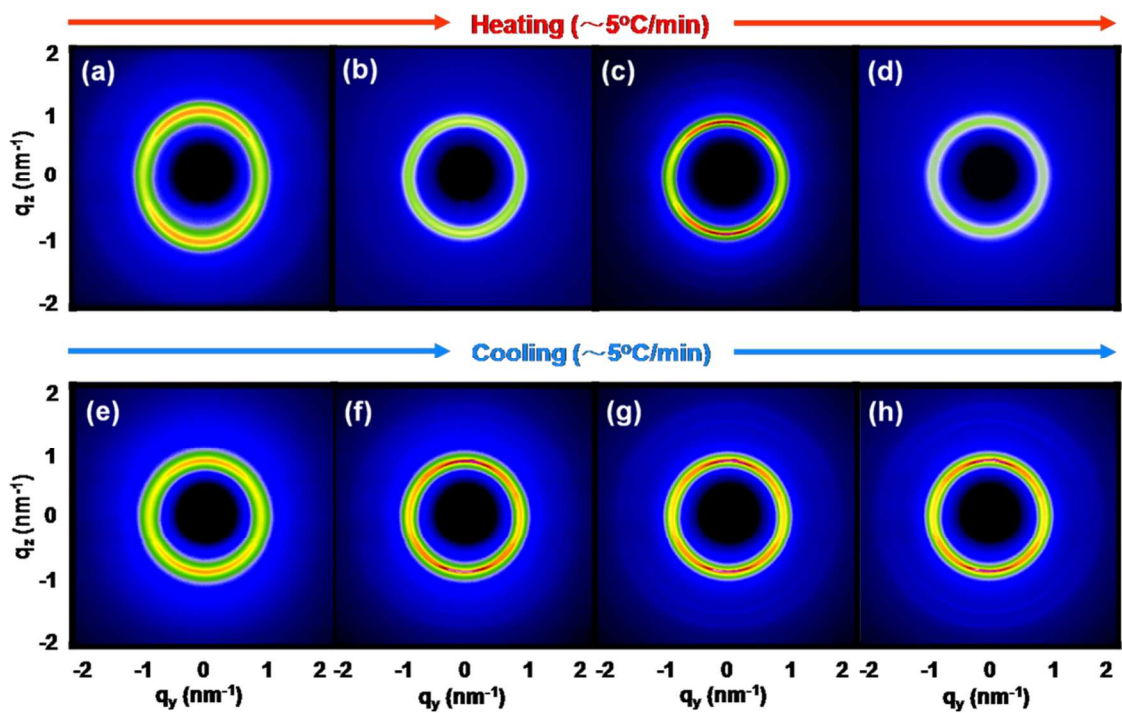

**Figure S5.** 2D X-ray diffraction patterns of P4VP(12CBP)<sub>0.3</sub> during the heating and cooling cycles. Data from the heating cycle were taken at (a) 30 °C, (b) 120 °C, (c) 140 °C, and (d) 180 °C. After stabilized ~10 min at 180 °C, data were collected during the cooling cycle at (e) 160 °C, (f) 130 °C, (g) 70 °C, and (h) 30 °C. Heating and cooling rates were ~5 °C/min.

REFERENCE:

- (1) Zheng, J. F.; Liu, X.; Chen, X. F.; Ren, X. K.; Yang, S.; Chen, E. Q. *ACS Macro Letters* **2012**, *1*, 641-645.
